# Supplementary material
Source: MDPI journal article supplement (https://www.mdpi.com/1424-2818/9/4/46)
Supplement: s1 [file s1]

# Positive Diagnosis of Ancient Leprosy and Tuberculosis using Ancient DNA and Lipid Biomarkers

Helen D. Donoghue<sup>1\*</sup>, G. Michael Taylor<sup>2</sup>, Graham R. Stewart<sup>2</sup>, Oona Y-C. Lee<sup>3</sup>, Houdini H.T. Wu<sup>3</sup>, Gurdyal S. Besra<sup>3</sup>, David E. Minnikin<sup>3</sup>

<sup>1</sup> Centre for Clinical Microbiology, University College London, London NW3 2PF, UK

<sup>2</sup> Department of Microbial Sciences, FHMS, University of Surrey, Guildford, GU2 7XH, UK

<sup>3</sup> Institute of Microbiology and Infection, School of Biosciences, University of Birmingham, Edgbaston, Birmingham B15 2TT, UK

**Table S1.** Summary of ancient tuberculosis methodology and biomarker findings according to date of publication.

| Authors                       | Year | Region                              | Period                                               | Techniques used                                                                                                                                     |
|-------------------------------|------|-------------------------------------|------------------------------------------------------|-----------------------------------------------------------------------------------------------------------------------------------------------------|
| Spigelman & Lemma [4]         | 1993 | Scotland.<br>Turkey.<br>Borneo.     | 17 <sup>th</sup> cent.<br>Byzantine.<br>Pre-contact. | Skeletal remains.<br>Repetitive sequence IS6110.<br>PCR amplicon 123bp.                                                                             |
| Salo <i>et al.</i> [5]        | 1994 | Chiribaya Alta,<br>South Peru.      | 11 <sup>th</sup> cent.<br>Pre-Columbian.             | Mummified tissue.<br>Nested PCR IS6110 123/97bp.<br>Cloned and sequenced amplicon.                                                                  |
| Arrieza <i>et al.</i> [22]    | 1995 | Arica,<br>Chile.                    | Pre-Columbian.                                       | Nested IS6110 PCR 123/97bp.<br>Confirmed by <i>Sal I</i> restriction enzyme digestion.                                                              |
| Baron <i>et al.</i> [23]      | 1996 | Göttingen,<br>Germany.              | Late 19 <sup>th</sup> cent. –<br>1918 CE.            | PCR 123bp & <i>Sal I</i> digestion.<br>MTB positives in bones without lesions.                                                                      |
| Taylor <i>et al.</i> [41]     | 1996 | Royal Mint, London,<br>UK.          | 1350–1538 CE.                                        | Nested IS6110 PCR 123/92bp.<br>Human DNA <i>Alu</i> repetitive element.                                                                             |
| Nerlich <i>et al.</i> [42]    | 1997 | Thebes- West, Upper<br>Egypt.       | 1550–1080 BCE.                                       | Pleural adhesions in mummy. Mycobacterial surface antigen target 133bp was sequenced.                                                               |
| Braun <i>et al.</i> [43]      | 1998 | Canada &<br>Mississippi.            | 15 <sup>th</sup> cent.<br>11 <sup>th</sup> cent.     | PCR IS6110 123/92bp.<br>Cloned and sequenced amplicons.                                                                                             |
| Donoghue <i>et al.</i> [9]    | 1998 | Karkur, Israel.                     | 600 CE.                                              | PCR IS6110 123/92 bp.<br>Amplicons sequenced.<br>MTB mycolic acid lipid biomarkers.                                                                 |
| Gernaey <i>et al.</i> [10]    | 1998 | Newcastle upon Tyne,<br>UK.         | 19 <sup>th</sup> cent.                               | MTB mycolic acid lipid biomarkers.                                                                                                                  |
| Taylor <i>et al.</i> [44]     | 1999 | Royal Mint, London,<br>UK.          | 1350–1538 CE.                                        | Hot-start PCR targeting <i>S6110</i> , <i>mtb40</i> , <i>oxyR</i> ,<br><i>rpoB</i> .<br>Line hybridization assay,<br>spoligotyping, DNA sequencing. |
| Gernaey <i>et al.</i> [10]    | 2001 | Addingham, Yorkshire,<br>UK.        | Early Mediaeval.<br>Anglo-Saxon.                     | Nested PCR IS6110 181bp.<br>MTB mycolic acid lipid biomarkers.                                                                                      |
| Rothschild <i>et al.</i> [45] | 2001 | Wyoming, USA.                       | 17,000 BP.<br>Natural Trap<br>Cave bison.            | PCR IS6110 & ribosomal protein S12.<br>Spoligotyping and principal components analysis indicate not <i>M. bovis</i> .                               |
| Zink <i>et al.</i> [24]       | 2001 | Thebes-West, Upper<br>Egypt.        | 3000 & 2120–500<br>BCE.                              | PCR IS6110 123bp.<br>Confirmed by restriction enzyme digestion or directly sequenced.                                                               |
| Mays & Taylor [46]            | 2002 | Wharram Percy,<br>Yorkshire,<br>UK. | 10 <sup>th</sup> –16 <sup>th</sup> cent.             | PCR IS6110, <i>oxyR</i> and sequenced.<br>Showed Hypertrophic Osteoarthropathy (HOA) linked to TB.                                                  |
| Spigelman <i>et al.</i> [47]  | 2002 | Scotland.<br>Turkey.<br>Borneo.     | 17 <sup>th</sup> cent.<br>Byzantine.<br>Pre-contact. | PCR IS6110 123/92bp,<br>INS-1/INS-2 246bp.<br>Ribosomal protein S12-F/S12-R.<br>Amplicons sequenced in 2 laboratories.                              |
| Fletcher <i>et al.</i> [25]   | 2003 | Vác, Hungary.                       | 18 <sup>th</sup> cent.                               | 350 samples from 168 bodies. IS6110 positives screened for other target sites.<br>Genotyped into groups 2 & 3.                                      |

|                                |      |                                                    |                                                                                                                                                         |                                                                                                                                              |
|--------------------------------|------|----------------------------------------------------|---------------------------------------------------------------------------------------------------------------------------------------------------------|----------------------------------------------------------------------------------------------------------------------------------------------|
| Taylor <i>et al.</i> [48]      | 2003 | Berlin, Germany.                                   | 1901 CE from 19 <sup>th</sup> cent. Koch patient.                                                                                                       | PCR IS6110, IS1081, <i>katG</i> , <i>gyrA</i> , <i>oxyR</i> , <i>pncA</i> , TbD1. Flanking & internal primers – all typical of MTB.          |
| Zink <i>et al.</i> [49]        | 2003 | Thebes-West, Upper Egypt.                          | 2050-1650 BCE.<br>ca. 500 BCE.                                                                                                                          | PCR IS6110 123bp.<br>Spoligotyping – <i>M. tuberculosis</i> .<br>Middle Kingdom – <i>M. africanum</i> .                                      |
| Bathurst & Barta [26]          | 2004 | Ontario, Canada.                                   | 16 <sup>th</sup> cent.<br>Iroquoian dog.                                                                                                                | PCR canine aDNA.<br>MTB IS6110 123/92bp.                                                                                                     |
| Donoghue <i>et al.</i> [36]    | 2005 | Egypt.<br>Hungary.<br>Israel.<br>Sweden.           | 4 <sup>th</sup> –5 <sup>th</sup> cent.<br>10 <sup>th</sup> –16 <sup>th</sup> cent.<br>1 <sup>st</sup> cent.<br>10 <sup>th</sup> –13 <sup>th</sup> cent. | PCR ML RLEP 129/99bp; MTB IS6110 123/92bp.<br>Several specimens co-infected with ML and MTB.                                                 |
| Taylor <i>et al.</i> [50]      | 2005 | Dorset, UK.                                        | 2200 BP.<br>Iron Age.                                                                                                                                   | PCR IS6110, IS1081, <i>katG</i> , <i>gyrA</i> , <i>oxyR</i> , <i>pncA</i> , TbD1. Flanking confirmed by sequencing.                          |
| Spigelman <i>et al.</i> [51]   | 2006 | Vác, Hungary.                                      | 18 <sup>th</sup> cent.                                                                                                                                  | Demonstrated co-morbidity – TB and Langerhans cell histiocytosis.                                                                            |
| Taylor <i>et al.</i> [27]      | 2007 | Tuva, South Siberia.                               | Iron Age.                                                                                                                                               | PCR IS6110, IS1081, TbD1, RD regions 4, 12, 13, 17, <i>oxyR</i> 285 (A), <i>pncA</i> 169 (G) indicate <i>M. bovis</i> amplicons sequenced.   |
| Hershkovitz <i>et al.</i> [28] | 2008 | Atlit Yam, Israel.                                 | 9,000 BP.<br>Sub-sea village.                                                                                                                           | PCR IS6110, IS1081, TbD1.<br>MTB mycolic acid lipid biomarkers.                                                                              |
| Matheson <i>et al.</i> [52]    | 2009 | Shroud Cave, Jerusalem, Israel.                    | 1 <sup>st</sup> cent.                                                                                                                                   | PCR - human haplotypes.<br>MTB, ML co-infection.<br>Family tomb - some related remains.                                                      |
| Murphy <i>et al.</i> [53]      | 2009 | Tuva, South Siberia.                               | Iron Age.                                                                                                                                               | Quantitative PCR used to estimate the amount of surviving <i>M. bovis</i> aDNA.                                                              |
| Redman <i>et al.</i> [54]      | 2009 | Coimbra, Portugal.                                 | 1837–1936 CE.<br>Documented TB.                                                                                                                         | MTB mycolipenic and mycocerosic acid lipid biomarkers.                                                                                       |
| Donoghue <i>et al.</i> [55]    | 2010 | Thebes, Egypt.                                     | 600 BCE.                                                                                                                                                | MTBC aDNA and mycolic acids in Granville mummy.                                                                                              |
| Donoghue <i>et al.</i> [56]    | 2011 | Vác, Hungary.                                      | 18 <sup>th</sup> cent.                                                                                                                                  | Identified MTB aDNA in pulmonary and extra-pulmonary tissue.<br>Localized and disseminated disease.                                          |
| Minnikin <i>et al.</i> [12]    | 2011 | Hungary.<br>Turkey.<br>Sweden.<br>UK.              | 7 <sup>th</sup> –15 <sup>th</sup> cent.<br>8 <sup>th</sup> –9 <sup>th</sup> cent.<br>10 <sup>th</sup> –13 <sup>th</sup> cent.<br>19 <sup>th</sup> cent. | MTB and ML mycolic acid lipid biomarkers in residues after DNA extraction.                                                                   |
| Nicklisch <i>et al.</i> [57]   | 2012 | Saxony-Anhalt, Germany.                            | 5,400–4,800 BCE.                                                                                                                                        | MTBC aDNA in long bones.<br>TbD1 region intact.                                                                                              |
| Bouwman <i>et al.</i> [30]     | 2012 | Leeds, UK.                                         | 19 <sup>th</sup> cent.                                                                                                                                  | Hybridization capture at specific regions of MTB genome.<br>WGS by oligonucleotide ligation and detection.                                   |
| Corthals <i>et al.</i> [58]    | 2012 | Salta, Argentina.                                  | 500 BP.                                                                                                                                                 | PCR and proteomic profiles of Andean mummy tissue using 16srRNA, MTB40, MTB41, <i>hsp65</i> primers.<br>Conclusions on host immune response. |
| Lee <i>et al.</i> [13]         | 2012 | Kiskundorozsma-Daruhalom dúlő II, Szeged, Hungary. | 7 <sup>th</sup> cent.                                                                                                                                   | Mycolic and mycocerosic acids confirm MTB/ML co-infection.                                                                                   |
| Lee <i>et al.</i> [29]         | 2012 | Wyoming, USA.                                      | 17,000 BP.<br>Natural Trap Cave bison.                                                                                                                  | MTBC mycolic (degraded), mycolipenic and mycocerosic acid and phthiocerol lipid biomarkers.                                                  |
| Masson <i>et al.</i> [59]      | 2013 | Szeged, Hungary.                                   | 7,000 BP.                                                                                                                                               | MTB aDNA IS1081.<br>MTBC mycolic (degraded) mycolipenic and mycocerosic acid lipid biomarkers.                                               |
| Chan <i>et al.</i> [31]        | 2013 | Vác, Hungary.                                      | 18 <sup>th</sup> cent.                                                                                                                                  | Metagenomic analysis of MTB sequences related to modern strains in Germany.<br>Mixed MTB infections – 2 strains.                             |
| Lairemruata <i>et al.</i> [60] | 2013 | Fayum, Lower Egypt.                                | 30 BCE–300 CE.                                                                                                                                          | Detected MTB and <i>Plasmodium falciparum</i> aDNA, cloned and sequenced. Identified single infections and 4 mixed infections.               |

|                                        |      |                                                 |                                                                                   |                                                                                                               |
|----------------------------------------|------|-------------------------------------------------|-----------------------------------------------------------------------------------|---------------------------------------------------------------------------------------------------------------|
| Bos <i>et al.</i> [32]                 | 2014 | Southern Peru.                                  | 1028–1280 CE.                                                                     | MTBC DNA capture assay for 5 target sites, sequenced on Illumina MySeq.<br><i>M. pinnepedii</i> infection.    |
| Dabernet <i>et al.</i> [61]            | 2014 | Yakutia,<br>Eastern Siberia.                    | 16 <sup>th</sup> –19 <sup>th</sup> cent.                                          | Frozen mummies – used IS6110 SNP typing by SNaPshot method.<br>MTB strains PGG2-SCG-5 (European).             |
| Müller <i>et al.</i> [62]              | 2014 | UK and Europe                                   | 2 <sup>nd</sup> –19 <sup>th</sup> cent.                                           | MTB aDNA in 10/34 samples - typed SNPs, large sequence polymorphisms, genotyped.<br>1 mixed infection.        |
| Borowska-Strugińska <i>et al.</i> [63] | 2014 | Kujawy Region, Central Poland.                  | Neolithic.                                                                        | MTB mycolic acid biomarkers by direct mass spectrometry.                                                      |
| Baker <i>et al.</i> [64]               | 2015 | Dja'de el Mughara, Syria.<br>Tell Aswad, Syria. | 8800–8300 BCE.<br>8200–7600 BCE.                                                  | IS6110 PCR, mtDNA, micro-CT scans. MTB mycolic (degraded), mycolipenic and mycocerosic acid lipid biomarkers. |
| Donoghue <i>et al.</i> [14]            | 2015 | Austria.<br>Hungary.                            | 8 <sup>th</sup> –9 <sup>th</sup> cent.<br>7 <sup>th</sup> –11 <sup>th</sup> cent. | IS6110 and 1081 PCR.<br>7 cases of MTB detected – 6 were co-infections with ML.                               |
| HersHKovitz <i>et al.</i> [65]         | 2015 | Atlit Yam, Israel.                              | 9,250–8,160 BP.                                                                   | Bones of 64 humans and 5 cattle examined for MTB aDNA.<br>No new positives.                                   |
| Lee <i>et al.</i> [66]                 | 2015 | Atlit Yam, Israel.                              | 9,000 BP.<br>Sub-sea village.                                                     | MTB phthiocerol, mycolipenic and mycocerosic acid lipid biomarkers.                                           |
| Kay <i>et al.</i> [33]                 | 2015 | Vác, Hungary.                                   | 18 <sup>th</sup> cent.                                                            | WGS of 14 genomes.<br>All were of lineage 4.<br>12 genotypes; some had multiple MTB strains.                  |
| Masson <i>et al.</i> [67]              | 2015 | Szeged, Hungary.                                | 7,000 BP.                                                                         | MTB aDNA IS6110 & 1081.<br>Mycolic and mycocerosic acid lipid biomarkers confirmed five MTB cases.            |

Numbered citations correspond to those in the main text. **Abbreviations:** BCE, Before Common Era; bp, base pairs; BP, Before Present, CE, Common Era; ML, *Mycobacterium leprae*; MTB, *Mycobacterium tuberculosis*; MTBC, *Mycobacterium tuberculosis* complex; PCR, Polymerase Chain Reaction; SNP, Single Nucleotide Polymorphism; WGS, Whole Genome Sequencing.

**Table S2.** Summary of ancient leprosy methodology and biomarker findings according to date of publication.

| Authors                        | Year | Region                                             | Period                                                      | Techniques used                                                                                                    |
|--------------------------------|------|----------------------------------------------------|-------------------------------------------------------------|--------------------------------------------------------------------------------------------------------------------|
| Rafi <i>et al.</i> [6]         | 1994 | River Jordan, Israel.                              | 6 <sup>th</sup> –7 <sup>th</sup> cent.                      | PCR for 36kDa (530 bp) and 65kDa (439 bp) antigens.                                                                |
| Haas <i>et al.</i> [68]        | 2000 | Rain/Lech, Germany.                                | 15 <sup>th</sup> –18 <sup>th</sup> cent.                    | Nested RLEP PCR (372 /320 bp).                                                                                     |
| Taylor <i>et al.</i> [34]      | 2000 | Newark Bay, Orkney, UK.                            | 11 <sup>th</sup> –12 <sup>th</sup> cent.                    | Hemi-nested RLEP PCR 175/153 bp.                                                                                   |
| Donoghue <i>et al.</i> [35]    | 2001 | Suraz, Poland.                                     | Mediaeval.                                                  | Nested RLEP PCR (129/99 bp).                                                                                       |
|                                |      | Hungary.                                           | 10 <sup>th</sup> –11 <sup>th</sup> & 15 <sup>th</sup> cent. | Nested 18kDa antigen PCR (136/110 bp).                                                                             |
| Spigelman & Donoghue [69]      | 2001 | Jerusalem, Israel.                                 | 4 <sup>th</sup> –7 <sup>th</sup> cent.                      | As above.                                                                                                          |
| Montiel <i>et al.</i> [70]     | 2003 | Seville, Spain.                                    | 12 <sup>th</sup> cent.                                      | Nested RLEP PCR (149/97 bp).                                                                                       |
| Donoghue <i>et al.</i> [36]    | 2005 | Akeldema, Himmon valley, Israel.                   | 1 <sup>st</sup> cent.                                       | Nested RLEP PCR 129/99 bp).                                                                                        |
|                                |      | The Dakhleh Oasis Kellis 2, Egypt.                 | 4 <sup>th</sup> cent.                                       | Co-infection MTB complex.                                                                                          |
|                                |      | Püspökladány-Eperjesvölgy, Hungary.                | 10 <sup>th</sup> cent.                                      | Nested IS6110 PCR (123/92 bp).                                                                                     |
|                                |      | Björned, Sweden.                                   | 11 <sup>th</sup> –13 <sup>th</sup> cent.                    |                                                                                                                    |
| Taylor <i>et al.</i> [37]      | 2006 | Blackfriars, Ipswich, UK.                          | 13 <sup>th</sup> –16 <sup>th</sup> cent.                    | Hemi-nested RLEP PCR(133/111 bp) and VNTR typing (99-131 bp).                                                      |
|                                |      | Wharram Percy, Yorkshire, UK.                      | 960–1100 CE.                                                |                                                                                                                    |
| Taylor <i>et al.</i> [11]      | 2009 | Blackfriars, Ipswich, UK.                          | 13 <sup>th</sup> –16 <sup>th</sup> cent.                    | RLEP PCR, VNTR, SNP genotyping.                                                                                    |
|                                |      | Devkesken 6, Uzbekistan.                           | 1 <sup>st</sup> –4 <sup>th</sup> cent.                      | As above, plus ML mycolic acids.                                                                                   |
| Watson <i>et al.</i> [71]      | 2009 | Radasinovci, Croatia.                              | 8 <sup>th</sup> –9 <sup>th</sup> cent.                      | RLEP, PCR, SNP genotyping.                                                                                         |
|                                |      | Odense, Denmark.                                   | 13 <sup>th</sup> –16 <sup>th</sup> cent.                    |                                                                                                                    |
|                                |      | Norwich, UK                                        | 10 <sup>th</sup> –11 <sup>th</sup> cent.                    |                                                                                                                    |
| Matheson <i>et al.</i> [53]    | 2009 | Akeldema, Himmon valley, Israel.                   | 1 <sup>st</sup> cent.                                       | PCR for multiple <i>M. leprae</i> , <i>M. tuberculosis</i> and human (mtDNA, amelogenin, and sex chromosome loci). |
| Monot <i>et al.</i> [18]       | 2009 | Dakhleh Oasis, Egypt.                              | 4 <sup>th</sup> –5 <sup>th</sup> cent.                      | SNP genotyping.                                                                                                    |
|                                |      | Ipswich, UK.                                       | 13 <sup>th</sup> –16 <sup>th</sup> cent.                    |                                                                                                                    |
|                                |      | Denmark.                                           | 13 <sup>th</sup> –16 <sup>th</sup> cent.                    |                                                                                                                    |
|                                |      | Turkey.                                            | 8 <sup>th</sup> –9 <sup>th</sup> cent.                      |                                                                                                                    |
|                                |      | Hungary.                                           | 7 <sup>th</sup> cent.                                       |                                                                                                                    |
|                                |      | Hungary.                                           | 10 <sup>th</sup> –11 <sup>th</sup> cent.                    |                                                                                                                    |
|                                |      | Croatia.                                           | 8 <sup>th</sup> –9 <sup>th</sup> cent.                      |                                                                                                                    |
| Suzuki <i>et al.</i> [72]      | 2010 | Aomori, Japan.                                     | 8 <sup>th</sup> –20 <sup>th</sup> cent.                     | WGA-PCR plus SNP genotyping.                                                                                       |
| Taylor & Donoghue [20]         | 2011 | Wharram Percy, Yorkshire, UK.                      | 10 <sup>th</sup> –12 <sup>th</sup> cent.                    | VNTR genotyping of 3 loci (99 -131 bp).                                                                            |
|                                |      | Blackfriars, Ipswich, UK.                          | 13 <sup>th</sup> –16 <sup>th</sup> cent.                    |                                                                                                                    |
|                                |      | Turkey.                                            | 8 <sup>th</sup> –9 <sup>th</sup> cent.                      |                                                                                                                    |
|                                |      | Prague, Czech Republic.                            | 9 <sup>th</sup> cent.                                       |                                                                                                                    |
|                                |      | Hungary.                                           | 7 <sup>th</sup> cent.                                       |                                                                                                                    |
|                                |      | Hungary.                                           | 10 <sup>th</sup> cent.                                      |                                                                                                                    |
|                                |      | Hungary.                                           | 11 <sup>th</sup> cent.                                      |                                                                                                                    |
| Minnikin <i>et al.</i> [12]    | 2011 | Hungary.                                           | 7 <sup>th</sup> –15 <sup>th</sup> cent.                     | MTB and ML mycolic acid lipid biomarkers in residues after DNA extraction.                                         |
|                                |      | Turkey.                                            | 8 <sup>th</sup> –9 <sup>th</sup> cent.                      |                                                                                                                    |
|                                |      | Sweden.                                            | 10 <sup>th</sup> –13 <sup>th</sup> cent.                    |                                                                                                                    |
|                                |      | UK.                                                | 19 <sup>th</sup> cent.                                      |                                                                                                                    |
| Lee <i>et al.</i> [13]         | 2012 | Kiskundorozsma-Daruhalom dűlő II, Szeged, Hungary. | 7 <sup>th</sup> cent.                                       | Mycolic and mycocerosic acids confirm TB/ML co-infection.                                                          |
| Taylor <i>et al.</i> [38]      | 2013 | Winchester, UK.                                    | 9 <sup>th</sup> –13 <sup>th</sup> cent.                     | Screening (RLEP / 18-kDa PCR). SNP genotyping. ML mycolic acids.                                                   |
| Schuenemann <i>et al.</i> [39] | 2013 | Winchester, UK.                                    | 9 <sup>th</sup> –13 <sup>th</sup> cent.                     | Whole Genome Sequencing (WGS).                                                                                     |
|                                |      | Sigtuna, Sweden.                                   | 10 <sup>th</sup> –14 <sup>th</sup> cent.                    | ML mycolic acids.                                                                                                  |
|                                |      | Refshale, Denmark.                                 | 11 <sup>th</sup> –12 <sup>th</sup> cent.                    |                                                                                                                    |
|                                |      | Jorgen, Denmark.                                   | 13 <sup>th</sup> –14 <sup>th</sup> cent.                    |                                                                                                                    |
| Economou <i>et al.</i> [73]    | 2013 | Sigtuna, Sweden.                                   | 10 <sup>th</sup> –14 <sup>th</sup> cent.                    | RLEP PCR. SNP genotyping.                                                                                          |

|                             |      |                                                                                                                                                                                                                                                                                                                                                                                         |                                                                                                                                                                                                                                                                                                                                                                                                                                                                   |                                                                                                                                                                                                                                       |
|-----------------------------|------|-----------------------------------------------------------------------------------------------------------------------------------------------------------------------------------------------------------------------------------------------------------------------------------------------------------------------------------------------------------------------------------------|-------------------------------------------------------------------------------------------------------------------------------------------------------------------------------------------------------------------------------------------------------------------------------------------------------------------------------------------------------------------------------------------------------------------------------------------------------------------|---------------------------------------------------------------------------------------------------------------------------------------------------------------------------------------------------------------------------------------|
| Mendum <i>et al.</i> [74]   | 2014 | Winchester, UK.<br>Winchester, UK.                                                                                                                                                                                                                                                                                                                                                      | 955–1033 CE.<br>1020–1162 CE.                                                                                                                                                                                                                                                                                                                                                                                                                                     | WGS.                                                                                                                                                                                                                                  |
| Donoghue <i>et al.</i> [14] | 2015 | Morrione, Italy.<br>Vicenne, Italy.<br>Kiskundorozsma-<br>Daruhalom dűlő II, Szeged,<br>Hungary.<br>Szentcsanak, Hungary.<br><br>Bélmegyer-Csömöki Domb,<br>Hungary.<br>Szarvas Grexa, Hungary.<br>Zwölfaxing, Austria,<br>Kovuklukaya, Turkey<br>Prušanky, Czech Republic<br>Hajdúdorog-Gyűlés, Hungary.<br>Felgyő,<br>Kettőshalmi-dűlő, Hungary.<br>Lászlófalva-Szentkirály, Hungary. | 6 <sup>th</sup> –8 <sup>th</sup> cent.<br>Mid–late 7 <sup>th</sup> cent.<br>7 <sup>th</sup> cent.<br><br>7 <sup>th</sup> –8 <sup>th</sup> cent.<br><br>7 <sup>th</sup> –9 <sup>th</sup> cent.<br><br>Late 7 <sup>th</sup> –9 <sup>th</sup> cent.<br>8 <sup>th</sup> –9 <sup>th</sup> cent.<br>8 <sup>th</sup> –9 <sup>th</sup> cent.<br>9 <sup>th</sup> –10 <sup>th</sup> cent.<br>10 <sup>th</sup> cent.<br>11 <sup>th</sup> cent.<br><br>11 <sup>th</sup> cent. | PCR for multiple <i>M. leprae</i> , and <i>M. tuberculosis</i> loci including nested RLEP PCR (129/99 bp) and nested 18kDa antigen PCR (136/110 bp).<br>Co-infection of <i>M. leprae</i> and <i>M. tuberculosis</i> at several sites. |
| Inskip <i>et al.</i> [40]   | 2015 | Great Chesterfield, Essex, UK.                                                                                                                                                                                                                                                                                                                                                          | 5 <sup>th</sup> –6 <sup>th</sup> cent.                                                                                                                                                                                                                                                                                                                                                                                                                            | PCR (RLEP & 18kDa), SNP & VNTR genotyping.<br>ML mycolic and mycocerosic acids.                                                                                                                                                       |
| Molnár <i>et al.</i> [75]   | 2015 | Bélmegyer-Csömöki Domb,<br>Hungary.                                                                                                                                                                                                                                                                                                                                                     | 7 <sup>th</sup> –9 <sup>th</sup> cent.                                                                                                                                                                                                                                                                                                                                                                                                                            | Mycolic, mycolipenic, mycocerosic acids<br>MTB/ML co-infections.                                                                                                                                                                      |
| Roffey <i>et al.</i> [76]   | 2017 | Winchester, UK.<br>Pilgrim.                                                                                                                                                                                                                                                                                                                                                             | 1020–1162 cal.<br>CE.                                                                                                                                                                                                                                                                                                                                                                                                                                             | PCR (RLEP & 18kDa), SNP & VNTR genotyping.                                                                                                                                                                                            |

Numbered citations correspond to those in the main text. **Abbreviations:** **bp**, base pairs; **CE**, Common Era; **ML**, *Mycobacterium leprae*; **MTB**, *Mycobacterium tuberculosis*; **PCR**, Polymerase Chain Reaction; **RLEP**, Repetitive sequence in the *Mycobacterium leprae* genome; **SNP**, Single Nucleotide Polymorphism; **VNTR**, Variable Number Tandem Repeats; **WGA**, Whole Genome Amplification; **WGS**, Whole Genome Sequencing.
