# Supplementary material
Source: MDPI journal article supplement (https://www.mdpi.com/1424-2818/9/4/46)
Supplement: s2 [file s2]

Positive Diagnosis of Ancient Leprosy and Tuberculosis using Ancient DNA and Lipid Biomarkers

Helen D. Donoghue 1*, G. Michael Taylor 2, Graham R. Stewart2, Oona Y-C. Lee3, Houdini H.T. Wu3, Gurdyal S. Besra3, David E. Minnikin3

1 Centre for Clinical Microbiology, University College London, London NW3 2PF, UK

2 Department of Microbial Sciences, FHMS, University of Surrey, Guildford, GU2 7XH, UK

3 Institute of Microbiology and Infection, School of Biosciences, University of Birmingham, Edgbaston, Birmingham B15 2TT, UK

**Table S1.** Summary of ancient tuberculosis methodology and biomarker findings according to date of publication.

| **Authors** | **Year** | **Region** | **Period** | **Techniques used** |
| --- | --- | --- | --- | --- |
| Spigelman & Lemma [4] | 1993 | Scotland.  Turkey.  Borneo. | 17th cent.  Byzantine.  Pre-contact. | Skeletal remains.  Repetitive sequence IS*6110.*  PCR amplicon 123bp. |
| Salo *et al*. [5] | 1994 | Chiribaya Alta,  South Peru. | 11th cent.  Pre-Columbian. | Mummified tissue.  Nested PCR IS*6110* 123/97bp.  Cloned and sequenced amplicon. |
| Arrieza *et al.* [22] | 1995 | Arica,  Chile. | Pre-Columbian. | Nested IS*6110* PCR 123/97bp.  Confirmed by *Sal I* restriction enzyme digestion. |
| Baron *et al.* [23] | 1996 | Göttingen,  Germany. | Late 19th cent. –1918 CE. | PCR 123bp & *Sal I* digestion.  MTB positives in bones without lesions. |
| Taylor *et al.* [41] | 1996 | Royal Mint, London,  UK. | 1350–1538 CE. | Nested IS*6110* PCR 123/92bp.  Human DNA *Alu* repetitive element. |
| Nerlich *et al.* [42] | 1997 | Thebes- West, Upper Egypt. | 1550–1080 BCE. | Pleural adhesions in mummy. Mycobacterial surface antigen target 133bp was sequenced. |
| Braun *et al.* [43] | 1998 | Canada &  Mississippi. | 15th cent.  11th cent. | PCR IS*6110* 123/92bp.  Cloned and sequenced amplicons. |
| Donoghue *et al*. [9] | 1998 | Karkur, Israel. | 600 CE. | PCR IS*6110* 123/92 bp.  Amplicons sequenced.  MTB mycolic acid lipid biomarkers. |
| Gernaey *et al.* [10] | 1998 | Newcastle upon Tyne, UK. | 19th cent. | MTB mycolic acid lipid biomarkers. |
| Taylor *et al.* [44] | 1999 | Royal Mint, London, UK. | 1350–1538 CE. | Hot-start PCR targeting S*6110*, *mtb40*, *oxyR, rpoB.*  Line hybridization assay,  spoligotyping, DNA sequencing. |
| Gernaey *et al.* [10] | 2001 | Addingham, Yorkshire, UK. | Early Mediaeval. Anglo-Saxon. | Nested PCR IS*6110* 181bp.  MTB mycolic acid lipid biomarkers. |
| Rothschild *et al.* [45] | 2001 | Wyoming, USA. | 17,000 BP. Natural Trap Cave bison. | PCR IS*6110* & ribosomal protein S12.  Spoligotyping and principal components analysis indicate not *M. bovis.* |
| Zink *et al.* [24] | 2001 | Thebes-West, Upper Egypt. | 3000 & 2120–500 BCE. | PCR IS*6110* 123bp.  Confirmed by restriction enzyme digestion or directly sequenced. |
| Mays & Taylor  [46] | 2002 | Wharram Percy, Yorkshire,  UK. | 10th–16th cent. | PCR IS*6110*, *oxyR* and sequenced.  Showed Hypertrophic Osteoarthropathy (HOA) linked to TB. |
| Spigelman *et al.* [47] | 2002 | Scotland.  Turkey.  Borneo. | 17th cent.  Byzantine.  Pre-contact. | PCR IS*6110* 123/92bp,  INS-1/INS-2 246bp.  Ribosomal protein S12-F/S12-R.  Amplicons sequenced in 2 laboratories. |
| Fletcher *et al.* [25] | 2003 | Vác, Hungary. | 18th cent. | 350 samples from 168 bodies. IS*6110* positives screened for other target sites.  Genotyped into groups 2 & 3. |
| Taylor *et al.* [48] | 2003 | Berlin,  Germany. | 1901 CE from 19th cent. Koch patient. | PCR IS*6110*, IS*1081*, *katG*, *gyrA*, *oxyR*, *pncA*, TbD1. Flanking & internal primers – all typical of MTB. |
| Zink *et al.* [49] | 2003 | Thebes-West, Upper Egypt. | 2050-1650 BCE.  ca. 500 BCE. | PCR IS*6110* 123bp.  Spoligotyping – *M. tuberculosis.*  Middle Kingdom – *M. africanum.* |
| Bathurst & Barta [26] | 2004 | Ontario, Canada. | 16th cent. Iroquoian dog. | PCR canine aDNA.  MTB IS*6110* 123/92bp. |
| Donoghue *et al.* [36] | 2005 | Egypt.  Hungary.  Israel.  Sweden. | 4th–5th cent.  10th–16th cent.  1st cent.  10th–13th cent. | PCR ML RLEP 129/99bp; MTB IS*6110* 123/92bp.  Several specimens co-infected with ML and MTB. |
| Taylor *et al.* [50] | 2005 | Dorset,  UK. | 2200 BP.  Iron Age. | PCR IS*6110*, IS*1081*, *katG*, *gyrA*, *oxyR*, *pncA*, TbD1. Flanking confirmed by sequencing. |
| Spigelman *et al.* [51] | 2006 | Vác,  Hungary. | 18th cent. | Demonstrated co-morbidity – TB and Langerhans cell histiocytosis. |
| Taylor *et al.* [27] | 2007 | Tuva,  South Siberia. | Iron Age. | PCR IS*6110*, IS*1081*, TbD1, RD regions 4, 12, 13, 17, *oxyR*285 (A), *pncA*169 (G) indicate *M. bovis* amplicons sequenced. |
| Hershkovitz *et al.* [28] | 2008 | Atlit Yam,  Israel. | 9,000 BP.  Sub-sea  village. | PCR IS*6110*, IS*1081*, TbD1.  MTB mycolic acid lipid biomarkers. |
| Matheson *et al.* [52] | 2009 | Shroud Cave, Jerusalem,  Israel. | 1st cent. | PCR - human haplotypes.  MTB, ML co-infection.  Family tomb - some related remains. |
| Murphy *et al.* [53] | 2009 | Tuva,  South Siberia. | Iron Age. | Quantitative PCR used to estimate the amount of surviving *M. bovis* aDNA. |
| Redman *et al.* [54] | 2009 | Coimbra,  Portugal. | 1837–1936 CE. Documented TB. | MTB mycolipenic and mycocerosic acid lipid biomarkers. |
| Donoghue *et al.* [55] | 2010 | Thebes,  Egypt. | 600 BCE. | MTBC aDNA and mycolic acids in Granville mummy. |
| Donoghue *et al.* [56] | 2011 | Vác, Hungary. | 18th cent. | Identified MTB aDNA in pulmonary and extra-pulmonary tissue.  Localized and disseminated disease. |
| Minnikin *et al.* [12] | 2011 | Hungary.  Turkey.  Sweden.  UK. | 7th–15th cent.  8th–9th cent.  10th–13th cent.  19th cent. | MTB and ML mycolic acid lipid biomarkers in residues after DNA extraction. |
| Nicklisch *et al.* [57] | 2012 | Saxony-Anhalt,  Germany. | 5,400–4,800 BCE. | MTBC aDNA in long bones.  TbD1 region intact. |
| Bouwman *et al.* [30] | 2012 | Leeds,  UK. | 19th cent. | Hybridization capture at specific regions of MTB genome.  WGS by oligonucleotide ligation and detection. |
| Corthals *et al.* [58] | 2012 | Salta,  Argentina. | 500 BP. | PCR and proteomic profiles of Andean mummy tissue using 16srRNA, MTB40, MTB41, *hsp65* primers.  Conclusions on host immune response. |
| Lee *et al.* [13] | 2012 | Kiskundorozsma-Daruhalom dűlő II, Szeged, Hungary. | 7th cent. | Mycolic and mycocerosic acids confirm MTB/ML co-infection. |
| Lee *et al.* [29] | 2012 | Wyoming, USA. | 17,000 BP. Natural Trap Cave bison. | MTBC mycolic (degraded), mycolipenic and mycocerosic acid and phthiocerol lipid biomarkers. |
| Masson *et al.* [59] | 2013 | Szeged, Hungary. | 7,000 BP. | MTB aDNA IS*1081.*  MTBC mycolic (degraded) mycolipenic and mycocerosic acid lipid biomarkers. |
| Chan *et al.* [31] | 2013 | Vác, Hungary. | 18th cent. | Metagenomic analysis of MTB sequences related to modern strains in Germany.  Mixed MTB infections – 2 strains. |
| Lairemruata *et al.* [60] | 2013 | Fayum, Lower  Egypt. | 30 BCE–300 CE. | Detected MTB and *Plasmodium falciparum* aDNA, cloned and sequenced. Identified single infections and 4 mixed infections. |
| Bos *et al.* [32] | 2014 | Southern Peru. | 1028–1280 CE. | MTBC DNA capture assay for 5 target sites, sequenced on Illumina MySeq.  *M. pinnepedii* infection. |
| Dabernet *et al.* [61] | 2014 | Yakutia,  Eastern Siberia. | 16th–19th cent. | Frozen mummies – used IS*6110* SNP typing by SNaPshot method.  MTB strains PGG2-SCG-5 (European). |
| Müller *et al.* [62] | 2014 | UK and Europe | 2nd–19th cent. | MTB aDNA in 10/34 samples - typed SNPs, large sequence polymorphisms, genotyped.  1 mixed infection. |
| Borowska-Strugińska *et al*. [63] | 2014 | Kujawy Region, Central Poland. | Neolithic. | MTB mycolic acid biomarkers by direct mass spectrometry. |
| Baker *et al.* [64] | 2015 | Dja'de el Mughara, Syria.  Tell Aswad,  Syria. | 8800–8300 BCE.  8200–7600 BCE. | IS*6110* PCR, mtDNA,  micro-CT scans. MTB mycolic (degraded), mycolipenic and mycocerosic acid lipid biomarkers. |
| Donoghue *et al.* [14] | 2015 | Austria.  Hungary. | 8th–9th cent.  7th–11th cent. | IS*6110* and *1081* PCR.  7 cases of MTB detected – 6 were co-infections with ML. |
| Hershkovitz *et al.* [65] | 2015 | Atlit Yam,  Israel. | 9,250–8,160 BP. | Bones of 64 humans and 5 cattle examined for MTB aDNA.  No new positives. |
| Lee *et al.* [66] | 2015 | Atlit Yam,  Israel. | 9,000 BP.  Sub-sea  village. | MTB phthiocerol, mycolipenic and mycocerosic acid lipid biomarkers. |
| Kay *et al.* [33] | 2015 | Vác,  Hungary. | 18th cent. | WGS of 14 genomes.  All were of lineage 4.  12 genotypes; some had multiple MTB strains. |
| Masson *et al*. [67] | 2015 | Szeged,  Hungary. | 7,000 BP. | MTB aDNA IS*6110* & *1081.*  Mycolic and mycocerosic acid lipid biomarkers confirmed five MTB cases. |

**N**umbered citations correspond to those in the main text. **Abbreviations: BCE**, Before Common Era; **bp**, base pairs; **BP**, Before Present, **CE**, Common Era; **ML**, *Mycobacterium leprae*; **MTB**, *Mycobacterium tuberculosis*; **MTBC**, *Mycobacterium tuberculosis* complex; **PCR**, Polymerase Chain Reaction; **SNP**, Single Nucleotide Polymorphism; **WGS**, Whole Genome Sequencing.

**Table S2.** Summary of ancient leprosy methodology and biomarker findings according to date of publication.

| **Authors** | **Year** | **Region** | **Period** | **Techniques used** |
| --- | --- | --- | --- | --- |
| Rafi *et al*. [6] | 1994 | River Jordan, Israel. | 6th–7th cent. | PCR for 36kDa (530 bp) and 65kDa (439 bp) antigens. |
| Haas *et al*. [68] | 2000 | Rain/Lech, Germany. | 15th–18th cent. | Nested RLEP PCR (372 /320 bp). |
| Taylor *et al.* [34] | 2000 | Newark Bay, Orkney, UK. | 11th–12th cent. | Hemi-nested RLEP PCR 175/153 bp. |
| Donoghue *et al.* [35] | 2001 | Suraz, Poland.  Hungary. | Mediaeval.  10th–11th & 15th cent. | Nested RLEP PCR (129/99 bp).  Nested 18kDa antigen PCR (136/110 bp). |
| Spigelman & Donoghue [69] | 2001 | Jerusalem, Israel. | 4th–7th cent. | As above. |
| Montiel *et al.* [70] | 2003 | Seville, Spain. | 12th cent. | Nested RLEP PCR (149/97 bp). |
| Donoghue *et al.* [36] | 2005 | Akeldema,  Himmon valley, Israel. | 1st cent. | Nested RLEP PCR 129/99 bp).  Co-infection MTB complex.  Nested IS6110 PCR (123/92 bp). |
| The Dakhleh Oasis Kellis 2, Egypt. | 4th cent. |
| Püspökladány-  Eperjesvölgy,  Hungary. | 10th cent. |
| Björned, Sweden. | 11th–13th cent. |
| Taylor *et al.* [37] | 2006 | Blackfriars, Ipswich, UK.  Wharram Percy, Yorkshire, UK. | 13th–16th cent.  960–1100 CE. | Hemi-nested RLEP PCR(133/111 bp) and VNTR typing (99-131 bp). |
| Taylor *et al.* [11] | 2009 | Blackfriars, Ipswich, UK. | 13th–16th cent. | RLEP PCR, VNTR, SNP genotyping. |
| Devkesken 6, Uzbekistan. | 1st–4th cent. | As above, plus ML mycolic acids. |
| Watson *et al*. [71] | 2009 | Radasinovci, Croatia. | 8th–9th cent. | RLEP, PCR, SNP genotyping. |
| Odense, Denmark. | 13th–16th cent. |
| Norwich, UK | 10th–11th cent. |
| Matheson *et al.* [53] | 2009 | Akeldema, Himmon valley, Israel. | 1st cent. | PCR for multiple *M. leprae,* *M. tuberculosis* and human (mtDNA, amelogenin, and sex chromosome loci). |
| Monot *et al.* [18] | 2009 | Dakhleh Oasis, Egypt.  Ipswich, UK.  Denmark.  Turkey.  Hungary.  Hungary.  Croatia. | 4th –5th cent.  13th–16th cent.  13th–16th cent.  8th–9th cent.  7th cent.  10th–11th cent.  8th–9th cent. | SNP genotyping. |
| Suzuki *et al.* [72] | 2010 | Aomori, Japan. | 8th–20th cent. | WGA-PCR plus SNP genotyping. |
| Taylor & Donoghue [20] | 2011 | Wharram Percy, Yorkshire, UK. | 10th–12th cent. | VNTR genotyping of 3 loci (99 -131 bp). |
| Blackfriars, Ipswich, UK. | 13th–16th cent. |
| Turkey. | 8th–9th cent. |
| Prague, Czech Republic. | 9th cent. |
| Hungary. | 7th cent. |
| Hungary. | 10th cent. |
| Hungary. | 11th cent. |
| Minnikin *et al.* [12] | 2011 | Hungary.  Turkey.  Sweden.  UK. | 7th–15th cent.  8th–9th cent.  10th–13th cent.  19th cent. | MTB and ML mycolic acid lipid biomarkers in residues after DNA extraction. |
| Lee *et al.* [13] | 2012 | Kiskundorozsma-Daruhalom dűlő II, Szeged, Hungary. | 7th cent. | Mycolic and mycocerosic acids confirm TB/ML co-infection. |
| Taylor *et al.* [38] | 2013 | Winchester, UK. | 9th–13th cent. | Screening (RLEP / 18-kDa PCR). SNP genotyping.  ML mycolic acids. |
| Schuenemann  *et al.* [39] | 2013 | Winchester, UK. | 9th–13th cent. | Whole Genome Sequencing (WGS).  ML mycolic acids. |
| Sigtuna, Sweden. | 10th–14th cent. |
| Refshale, Denmark. | 11th-12th cent. |
| Jorgen, Denmark. | 13th–14th cent. |
| Economou *et al.* [73] | 2013 | Sigtuna, Sweden. | 10th–14th cent. | RLEP PCR.  SNP genotyping. |
| Mendum *et al.* [74] | 2014 | Winchester, UK.  Winchester, UK. | 955–1033 CE.  1020–1162 CE. | WGS. |
| Donoghue *et al.* [14] | 2015 | Morrione, Italy. | 6th–8th cent. | PCR for multiple *M. leprae,* and *M. tuberculosis* loci  including nested RLEP PCR (129/99 bp) and  nested 18kDa antigen PCR (136/110 bp).  Co-infection of *M. leprae* and *M. tuberculosis*  at several sites. |
| Vicenne, Italy. | Mid–late 7th cent. |
| Kiskundorozsma-  Daruhalom dűlő II, Szeged, Hungary. | 7th cent. |
| Szentes-Kistőke, Hungary. | 7th–8th cent. |
| Bélmegyer-Csömöki Domb, Hungary. | 7th–9th cent. |
| Szarvas Grexa, Hungary. | Late 7th–9th cent. |
| Zwölfaxing, Austria, | 8th–9th cent. |
| Kovuklukaya, Turkey | 8th–9th cent. |
| Prušanky, Czech Republic | 9th–10th cent. |
| Hajdúdorog-Gyúlás, Hungary. | 10th cent. |
| Felgyő,  Kettőshalmi-dűlő, Hungary. | 11th cent. |
| Lászlófalva-Szentkirály, Hungary. | 11th cent. |
| Inskip *et al.* [40] | 2015 | Great Chesterfield, Essex, UK. | 5th–6th cent. | PCR (RLEP & 18kDa), SNP & VNTR genotyping.  ML mycolic and mycocerosic acids. |
| Molnár *et al.* [75] | 2015 | Bélmegyer-Csömöki Domb, Hungary. | 7th–9th cent. | Mycolic, mycolipenic, mycocerosic acids MTB/ML co-infections. |
| Roffey *et al.* [76] | 2017 | Winchester, UK.  Pilgrim. | 1020–1162 cal. CE. | PCR (RLEP & 18kDa), SNP & VNTR genotyping. |

Numbered citations correspond to those in the main text. **Abbreviations: bp**, base pairs; **CE**, Common Era; **ML**, *Mycobacterium leprae*; **MTB**, *Mycobacterium tuberculosis*; **PCR**, Polymerase Chain Reaction; **RLEP**, Repetitive sequence in the *Mycobacterium leprae* genome; **SNP**, Single Nucleotide Polymorphism; **VNTR**, [Variable Number Tandem Repeats](https://www.nlm.nih.gov/visibleproofs/education/dna/vntr.pdf); **WGA**, Whole Genome Amplification; **WGS**, Whole Genome Sequencing.
